# Supplementary material for: Transient expression and purification of β-caryophyllene synthase in Nicotiana benthamiana to produce β-caryophyllene in vitro
Source: PeerJ journal article supplement (doi:10.7717/peerj.8904), 2020-04-28
Supplement: Raw_data-4_Feb.zip [file Raw_data-4_Feb.zip]

## Relative Expression Results

| Parameter  | Value |
|------------|-------|
| Iterations | 2000  |

| Gene   | Type | Reaction Efficiency | Expression | Std. Error        | 95% C.I.          | P(H1) Result |
|--------|------|---------------------|------------|-------------------|-------------------|--------------|
| EF1    | REF  | 0.9092              | 1.000      |                   |                   |              |
| 3 DPI  | TRG  | 0.8857              | 14.662     | 12.640 - 16.681   | 12.149 - 18.880   | 0.021 UP     |
| 6 DPI  | TRG  | 0.8857              | 159.228    | 121.899 - 192.428 | 110.751 - 230.103 | 0.009 UP     |
| 9 DPI  | TRG  | 0.8857              | 361.668    | 310.087 - 422.183 | 292.303 - 462.650 | 0.021 UP     |
| 12 DPI | TRG  | 0.8857              | 182.687    | 151.853 - 206.033 | 149.204 - 251.332 | 0.021 UP     |
| 15 DPI | TRG  | 0.8857              | 1.000      | 0.840 - 1.199     | 0.772 - 1.296     | 0.778        |
| Actin  | REF  | 0.8438              | 1.000      |                   |                   |              |

### Interpretation

3 DPI is UP-regulated in sample group (in comparison to control group) by a mean factor of 14.662 (S.E. range is 12.640 - 16.681).

3 DPI sample group is different to control group. P(H1)=0.021

6 DPI is UP-regulated in sample group (in comparison to control group) by a mean factor of 159.228 (S.E. range is 121.899 - 192.428).

6 DPI sample group is different to control group. P(H1)=0.009

9 DPI is UP-regulated in sample group (in comparison to control group) by a mean factor of 361.668 (S.E. range is 310.087 - 422.183).

9 DPI sample group is different to control group. P(H1)=0.021

12 DPI is UP-regulated in sample group (in comparison to control group) by a mean factor of 182.687 (S.E. range is 151.853 - 206.033).

12 DPI sample group is different to control group. P(H1)=0.021

15 DPI sample group is not different to control group. P(H1)=0.778

Non-Normalised Results

| Gene   | Type | Reaction Efficiency | Expression | Std. Error        | 95% C.I.          | P(H1) Result |
|--------|------|---------------------|------------|-------------------|-------------------|--------------|
| EF1    | REF  | 0.9092              | 1.000      | 0.941 - 1.063     | 0.900 - 1.112     | 0.776        |
| 3 DPI  | TRG  | 0.8857              | 14.662     | 12.640 - 18.599   | 11.465 - 19.342   | 0.000 UP     |
| 6 DPI  | TRG  | 0.8857              | 159.228    | 124.687 - 192.428 | 112.487 - 240.657 | 0.000 UP     |
| 9 DPI  | TRG  | 0.8857              | 361.668    | 303.325 - 436.155 | 291.391 - 483.325 | 0.000 UP     |
| 12 DPI | TRG  | 0.8857              | 182.687    | 140.913 - 218.628 | 134.067 - 282.948 | 0.000 UP     |
| 15 DPI | TRG  | 0.8857              | 1.000      | 0.791 - 1.271     | 0.690 - 1.452     | 0.590        |
| Actin  | REF  | 0.8438              | 1.000      | 0.885 - 1.134     | 0.832 - 1.202     | 0.590        |
